# Supplementary material for: Crystal engineering of pharmaceutical co-crystals from polymorphic active pharmaceutical ingredients
Source: Royal Society of Chemistry journal article supplement (doi:10.1039/b501304f), 2005-01-01
Supplement: b501304f.pdf [file b501304f.pdf]

# Crystal engineering of pharmaceutical co-crystals from polymorphic active pharmaceutical ingredients.

Peddy Vishweshwar,<sup>a</sup> Jennifer A. McMahon,<sup>a</sup> Matthew L. Peterson,<sup>b</sup> Magali B. Hickey,<sup>b</sup> Tanise R. Shattock<sup>a</sup> and Michael J. Zaworotko<sup>\*a</sup>

<sup>a</sup> Department of Chemistry, University of South Florida, SCA400, 4202 E. Fowler Avenue, Tampa, Florida, 33620, USA

<sup>b</sup> TransForm Pharmaceuticals, Inc., 29 Hartwell Avenue, Lexington, Massachusetts, 02421, USA

## Polymorph Screen

### Goal:

The goal of the grinding/slurrying screen was to determine if co-crystals **4** and **5** would exhibit polymorphism when ground dry or in the presence of different solvents.

### Methods:

**Synthesis via grinding.** For each co-crystal, a series of 23 solvents was explored. The samples were analyzed using powder X-ray diffraction (See figures 1–4). Powder X-ray diffraction (PXRD) patterns were measured on a Rigaku D/Max Rapid image plate diffractometer (Rigaku/MSK, Woodlands, TX) employing Cu K $\alpha$  radiation with a 0.3 mm collimator and a 2.0 kW source, operating at 46 kV/40 mA. Preferred-orientation effects were minimized by collecting PXRD data in transmission mode, while oscillating about the *phi*-axis from 0 to 5° and spinning 360° about the  $\phi$ -axis at 2 deg/s. Some PXRD patterns were also measured on a Bruker AXS D8 Discover X-ray Diffractometer. This instrument was equipped with GADDS<sup>TM</sup> (General Area Diffraction Detection System), a Bruker AXS HI-STAR Area Detector at a distance of 15.05 cm as per system calibration, a copper source (Cu/K $\alpha$  1.54056 angstroms), automated x-y-z stage, and 0.5mm collimator.

**Synthesis via slurrying.** Complete conversion to the Piracetam:p-hydroxybenzoic acid co-crystal was effected by slurrying Piracetam (0.088g, 0.62mmol) and p-hydroxybenzoic acid (0.084g, 0.62mmol) in water (100 $\mu$ L) for 16 hours. Slurrying equimolar amounts of Piracetam (0.088g, 0.62mmol) and gentisic acid (0.096g, 0.62mmol) in water (80 $\mu$ L) for 60 hours resulted in complete conversion to the co-

crystal. PXRD was used to confirm the outcome of these experiments and to observe intermediate degrees of conversion at shorter times.

**Materials:**

Piracetam (Sigma)

Gentic acid (Sigma)

*p*-hydroxybenzoic acid (Sigma)

**Solvents used:**

Water, acetone, methanol, ethanol, ethyl acetate, n-hexane, toluene, acetonitrile, tetrahydrofuran, isopropyl acetate, benzyl alcohol, nitromethane, dimethyl amine, 2-butanol, ethyl formate, acetic acid, methyl ethyl ketone, methyl tertiary butyl ether, chlorobenzene, N-methyl pyrrolidone, 1,2-dichloroethane, dimethylsulfoxide and dimethoxy ethane.

**Conclusion:**

Both co-crystals **4** and **5** were obtained from all conditions as a mixture with one or both starting materials and do not exhibit polymorphism based on the series of solvent-mediated grinding experiments.

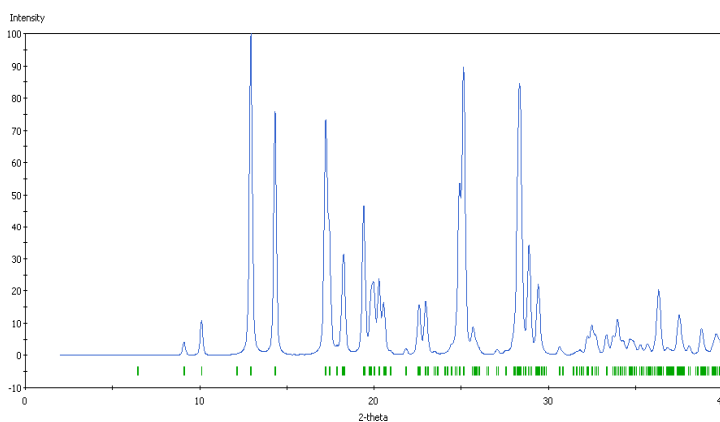

**Figure 1.** Calculated powder pattern for Piracetam:Gentic acid co-crystal **4**.

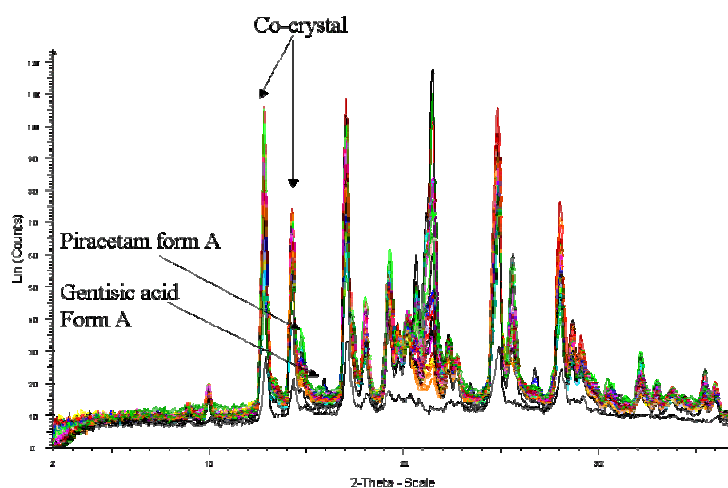

**Figure 2.** Overlay of powder patterns obtained from solvent drop grinding Piracetam and gentic acid.

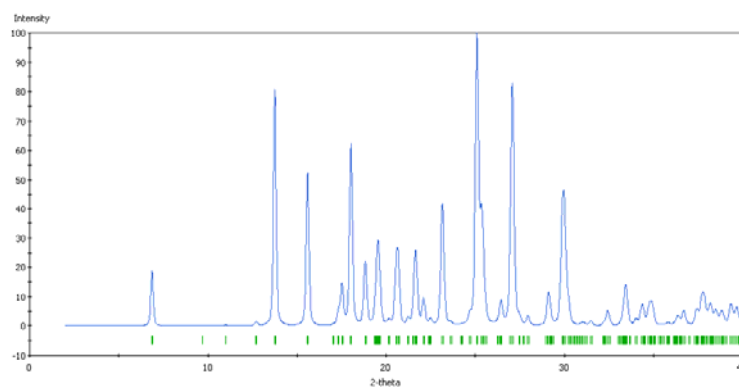

**Figure 3.** Calculated powder pattern for Piracetam : *p*-hydroxybenzoic acid co-crystal 5.

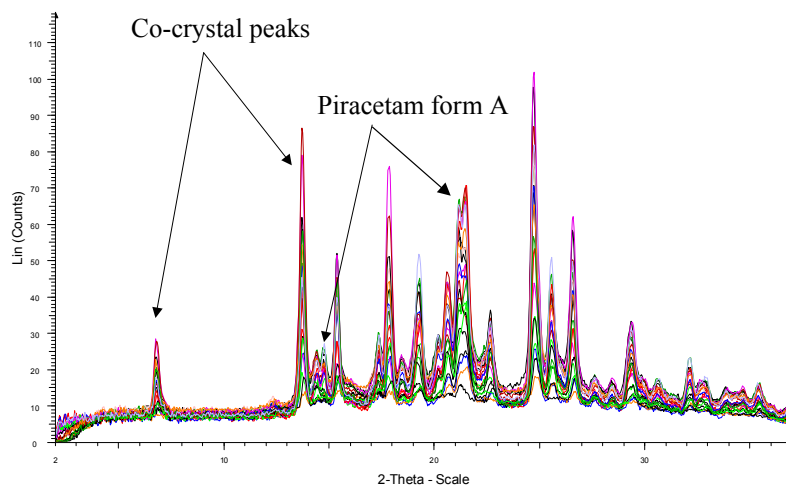

**Figure 4.** Overlay of powder patterns obtained from solvent drop grinding Piracetam and *p*-hydroxybenzoic acid.

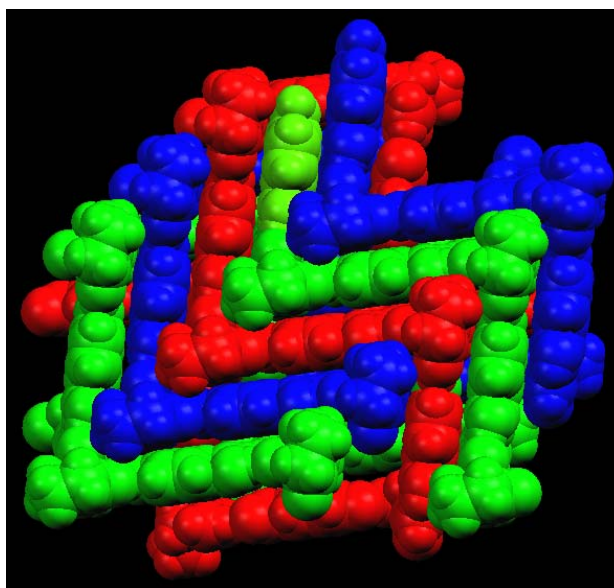

**Figure 5.** Space filling diagram of the 3-fold interpenetrated network of Piracetam: *p*-hydroxybenzoic acid co-crystal, **5**.
